# Supplementary material
Source: Frontiers journal article supplement (https://www.frontiersin.org/articles/410650)
Supplement: Image_2.pdf [file Image_2.pdf]

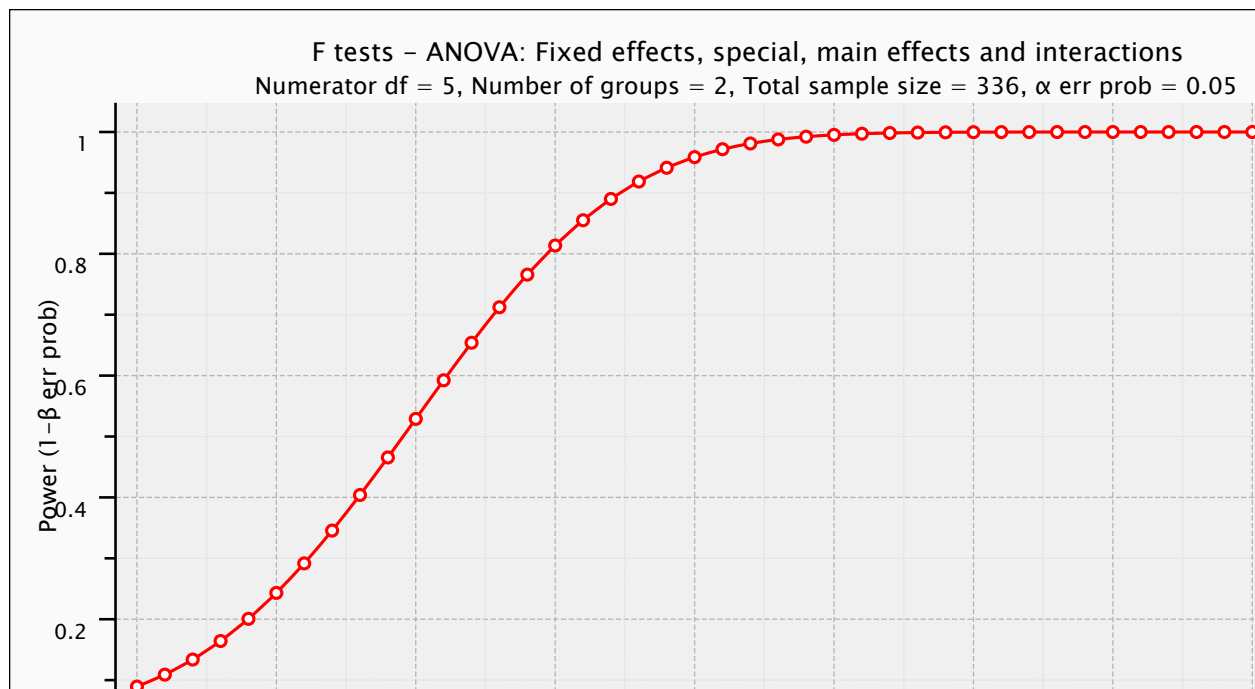

Supplementary Figure 2: The power of doing an eQTL analysis using ANOVA with an interaction term, calculated using G\*POWER. This is a post hoc analysis of the power at various effect sizes, with a sample size of 336, type I error = 0.05, and 2 groups (male and female). The significance level is set at 0.05, and Number of groups (male vs female) set at 2.
